# Supplementary material for: Distribution of planktonic foraminifera in the subtropical South Atlantic: depth hierarchy of controlling factors
Source: Copernicus journal article supplement (doi:10.5194/bg-17-4313-2020), 2020-08-28
Supplement: Supplementary file 1 [file bg-17-4313-2020-supplement.zip]

Archive with 4 entries (4 files):
- Figure S2.pdf
- Figure S3.jpg
- Lessa_et_al_BGS_supplementary figures_and_tables_V2.docx
- bg-17-4313-2020-supplement-title-page.pdf
