# Supplementary material for: Distribution of planktonic foraminifera in the subtropical South Atlantic: depth hierarchy of controlling factors
Source: Copernicus journal article supplement (doi:10.5194/bg-17-4313-2020), 2020-08-28
Supplement: Supplementary file 1 [file bg-17-4313-2020-supplement.zip › bg-17-4313-2020-supplement-title-page.pdf]

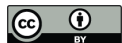

## *Supplement of*

# **Distribution of planktonic foraminifera in the subtropical South Atlantic: depth hierarchy of controlling factors**

**Douglas Lessa et al.**

*Correspondence to:* Douglas Lessa (dvolessa@id.uff.br)

- [bg-17-4313-2020-supplement-title-page.pdf](#)
- [Figure S2.pdf](#)
- [Figure S3.jpg](#)
- [Lessa\\_et\\_al\\_BGS\\_supplementary\\_figures\\_and\\_tables\\_V2.docx](#)

The copyright of individual parts of the supplement might differ from the CC BY 4.0 License.
