# Supplementary material for: Distribution of planktonic foraminifera in the subtropical South Atlantic: depth hierarchy of controlling factors
Source: Copernicus journal article supplement (doi:10.5194/bg-17-4313-2020), 2020-08-28
Supplement: Supplementary file 1 [file bg-17-4313-2020-supplement.zip › Lessa_et_al_BGS_supplementary figures_and_tables_V2.docx]

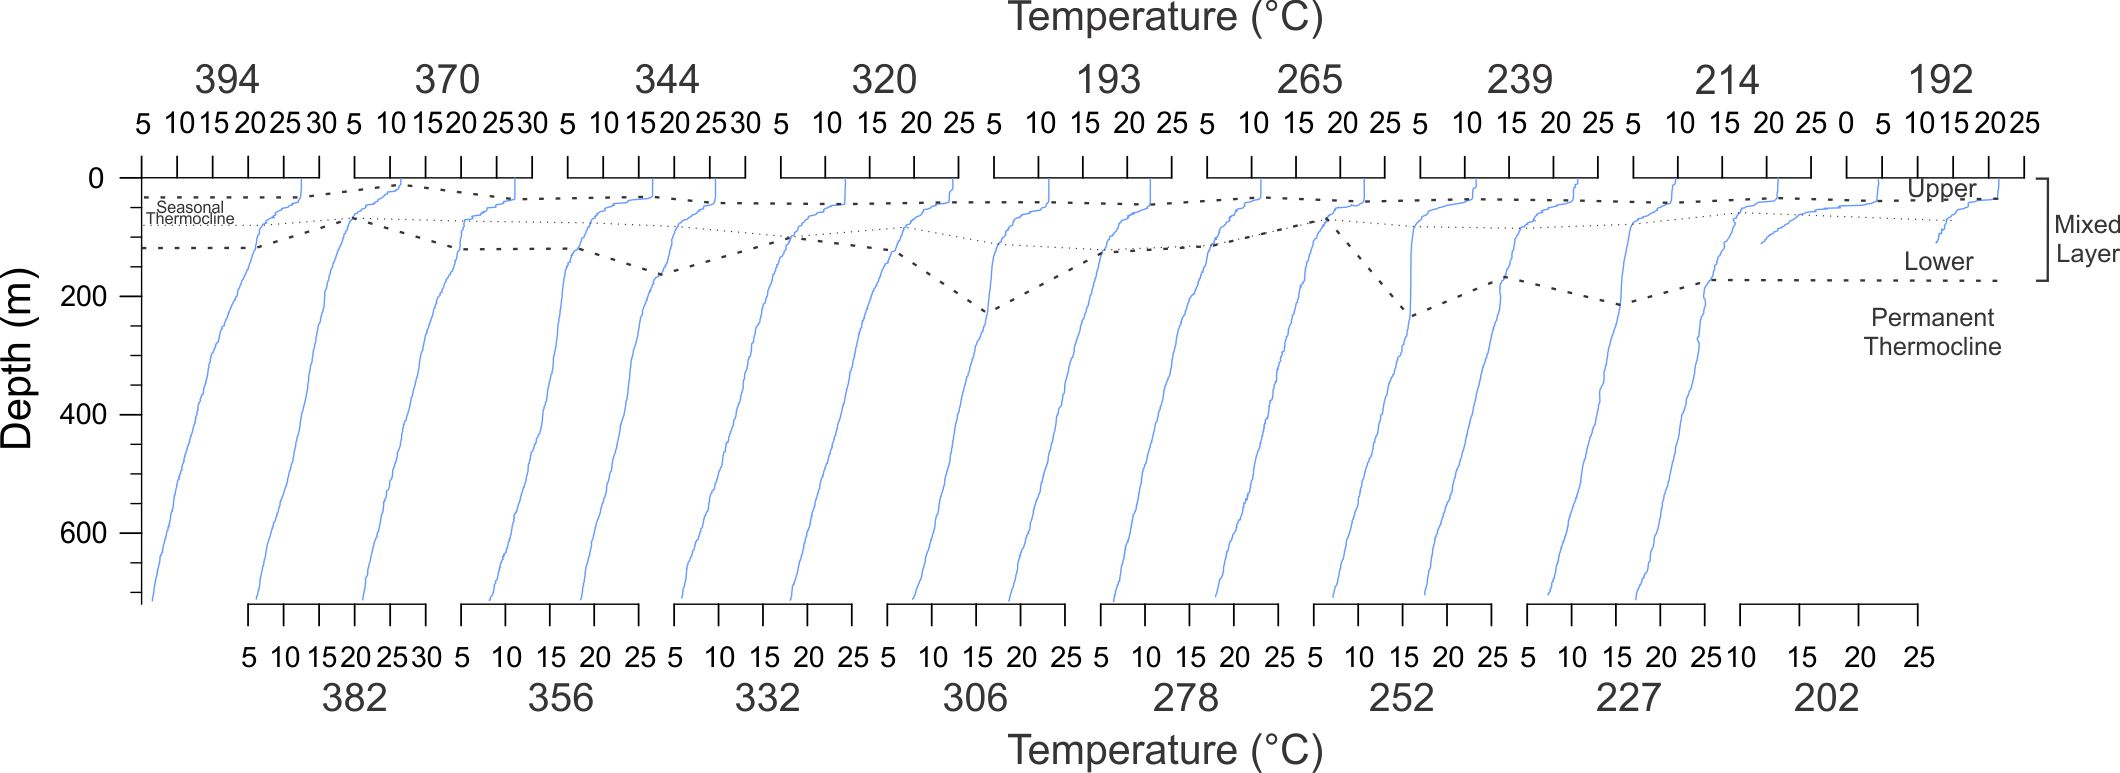


Figure S1. Thermal upper 700 m profiles of M124 stations and the upper, lower mixed layer and permanent thermocline delimitation.

Figure S2 – PDF attached file

Figure S2. Total concentration of living (with cytoplasm) and empty (no cytoplasm) planktonic foraminifera tests for each station and depth layer. Note that concentration values are shown in logarithmic scale.

Figure S3 – see JPEG attached file

Figure S3. Total living planktonic foraminifera for each station and depth layer separating adult and pre-adult tests.


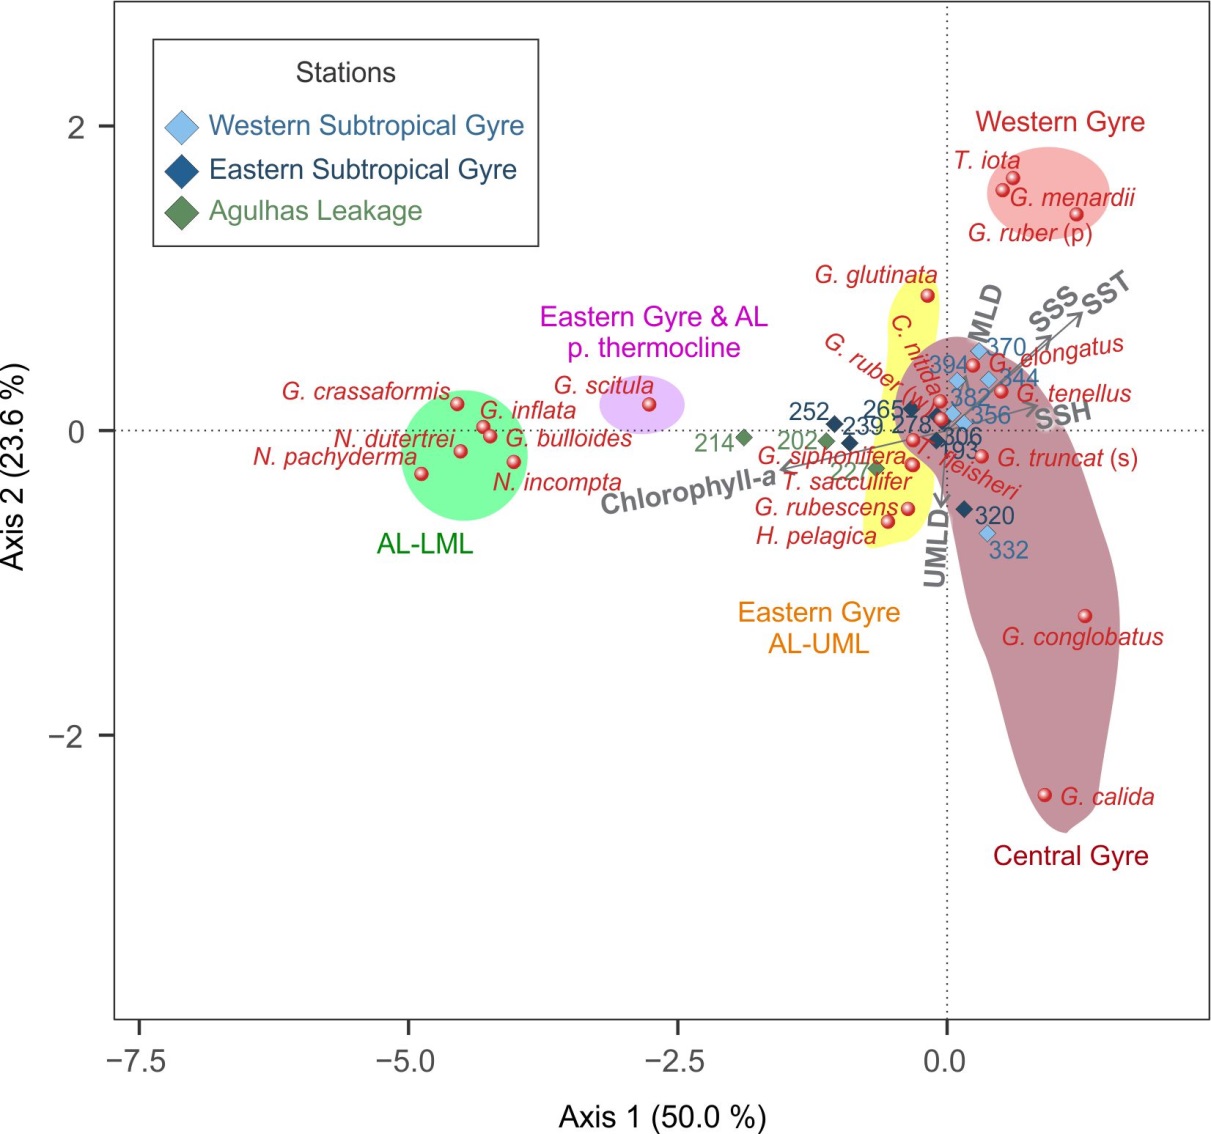


Figure S4. Canonical Correspondence analysis plot with the figure 8 matrix data without the station 192 (Benguela). Acronyms: UMLD = upper mixed layer depth; MLD = mixed layer depth (comprising both upper and lower mixed layer); SST = sea surface temperature; SSS = sea surface salinity; SSH = sea surface height; AL = Agulhas Leakage; UML = upper mixed layer; LML = lower mixed layer.


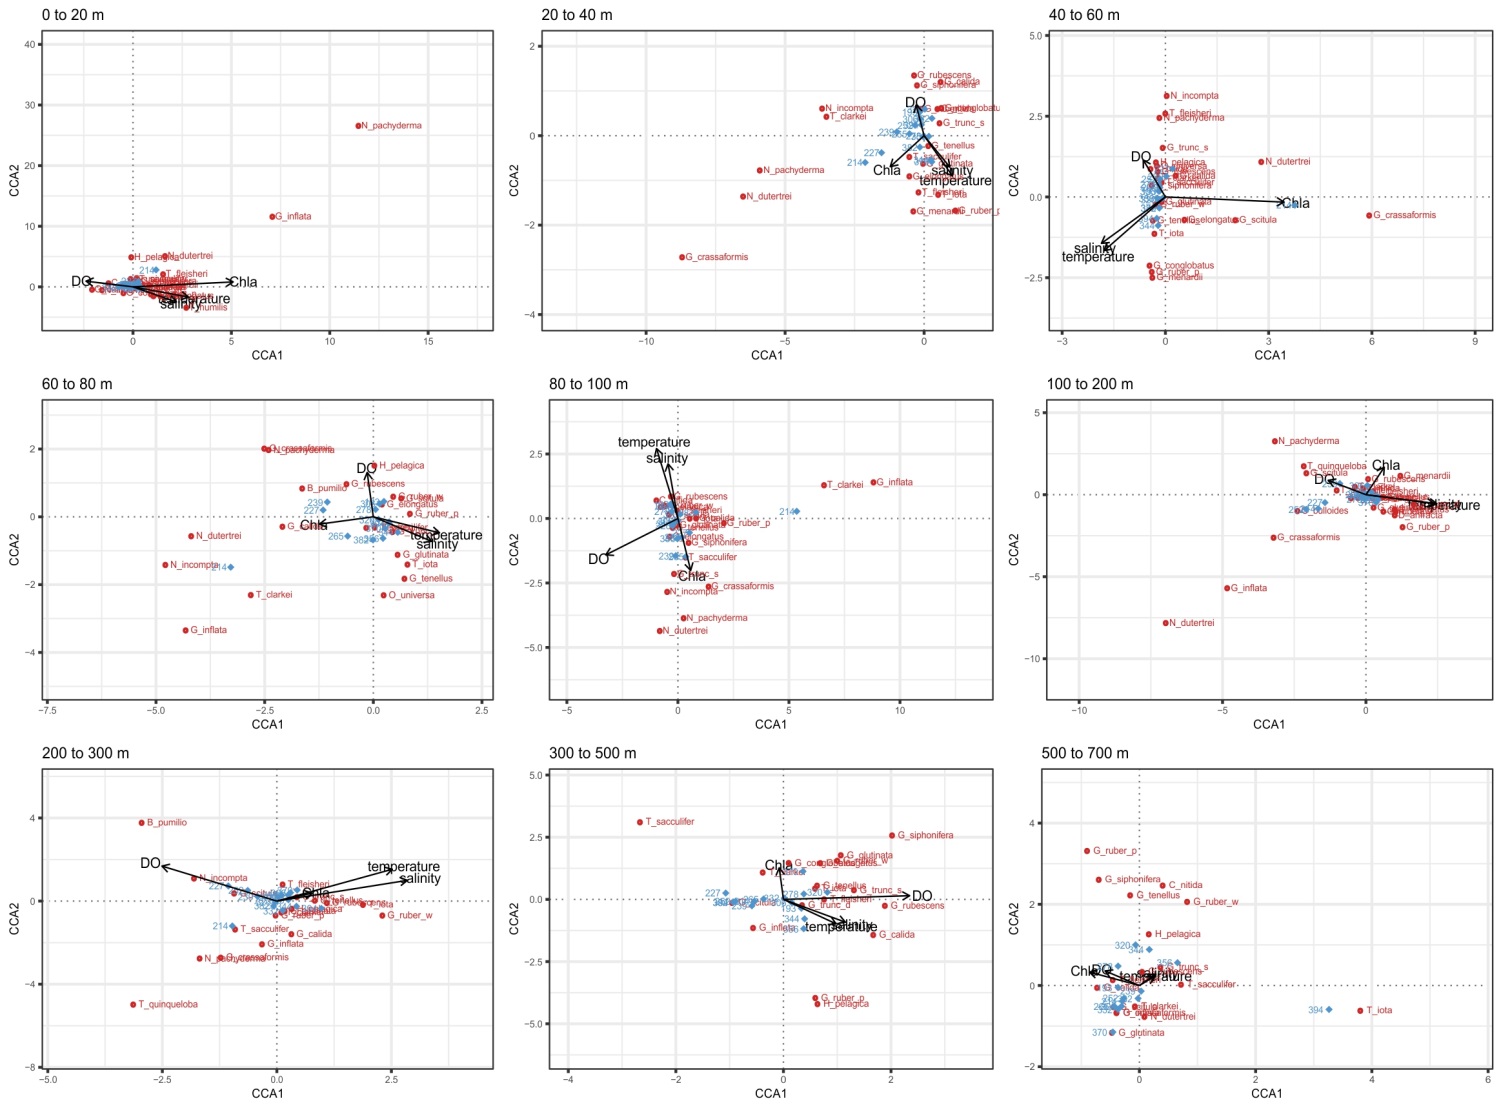


Figure S5. Graphical canonical correspondence analysis plots for separated depth section.
