# Supplementary figures and images for: Distribution of planktonic foraminifera in the subtropical South Atlantic: depth hierarchy of controlling factors
Source: Copernicus journal article supplement (doi:10.5194/bg-17-4313-2020), 2020-08-28

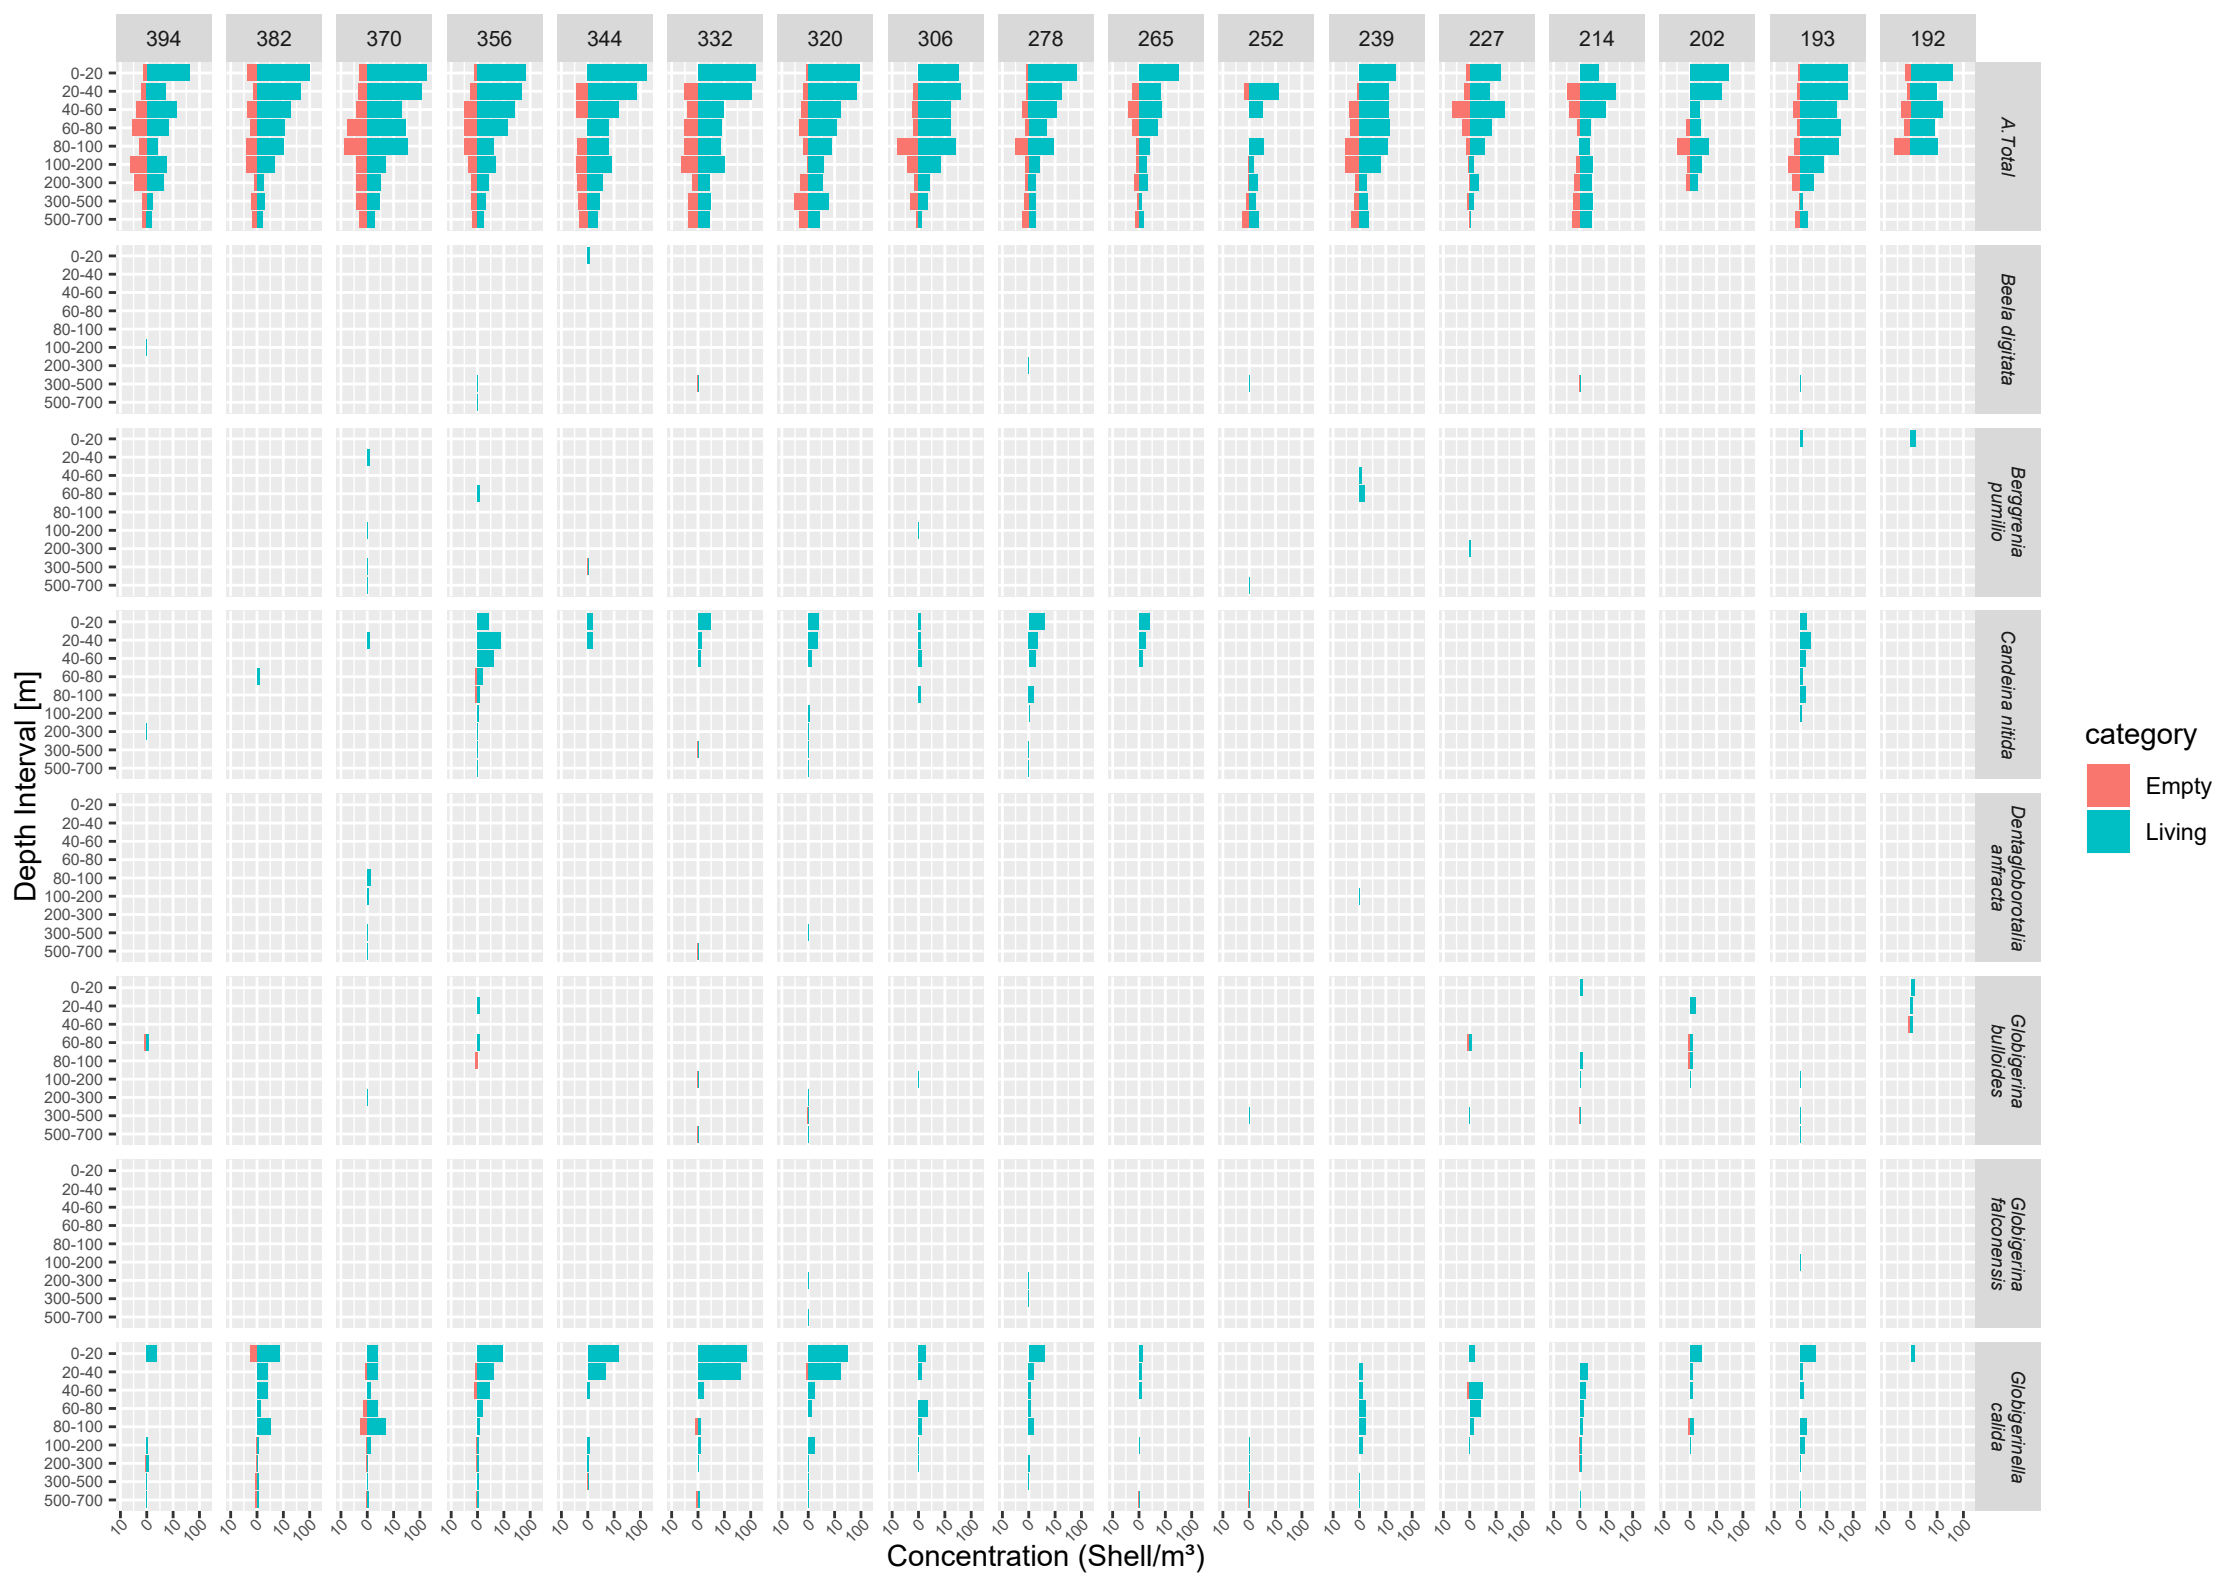

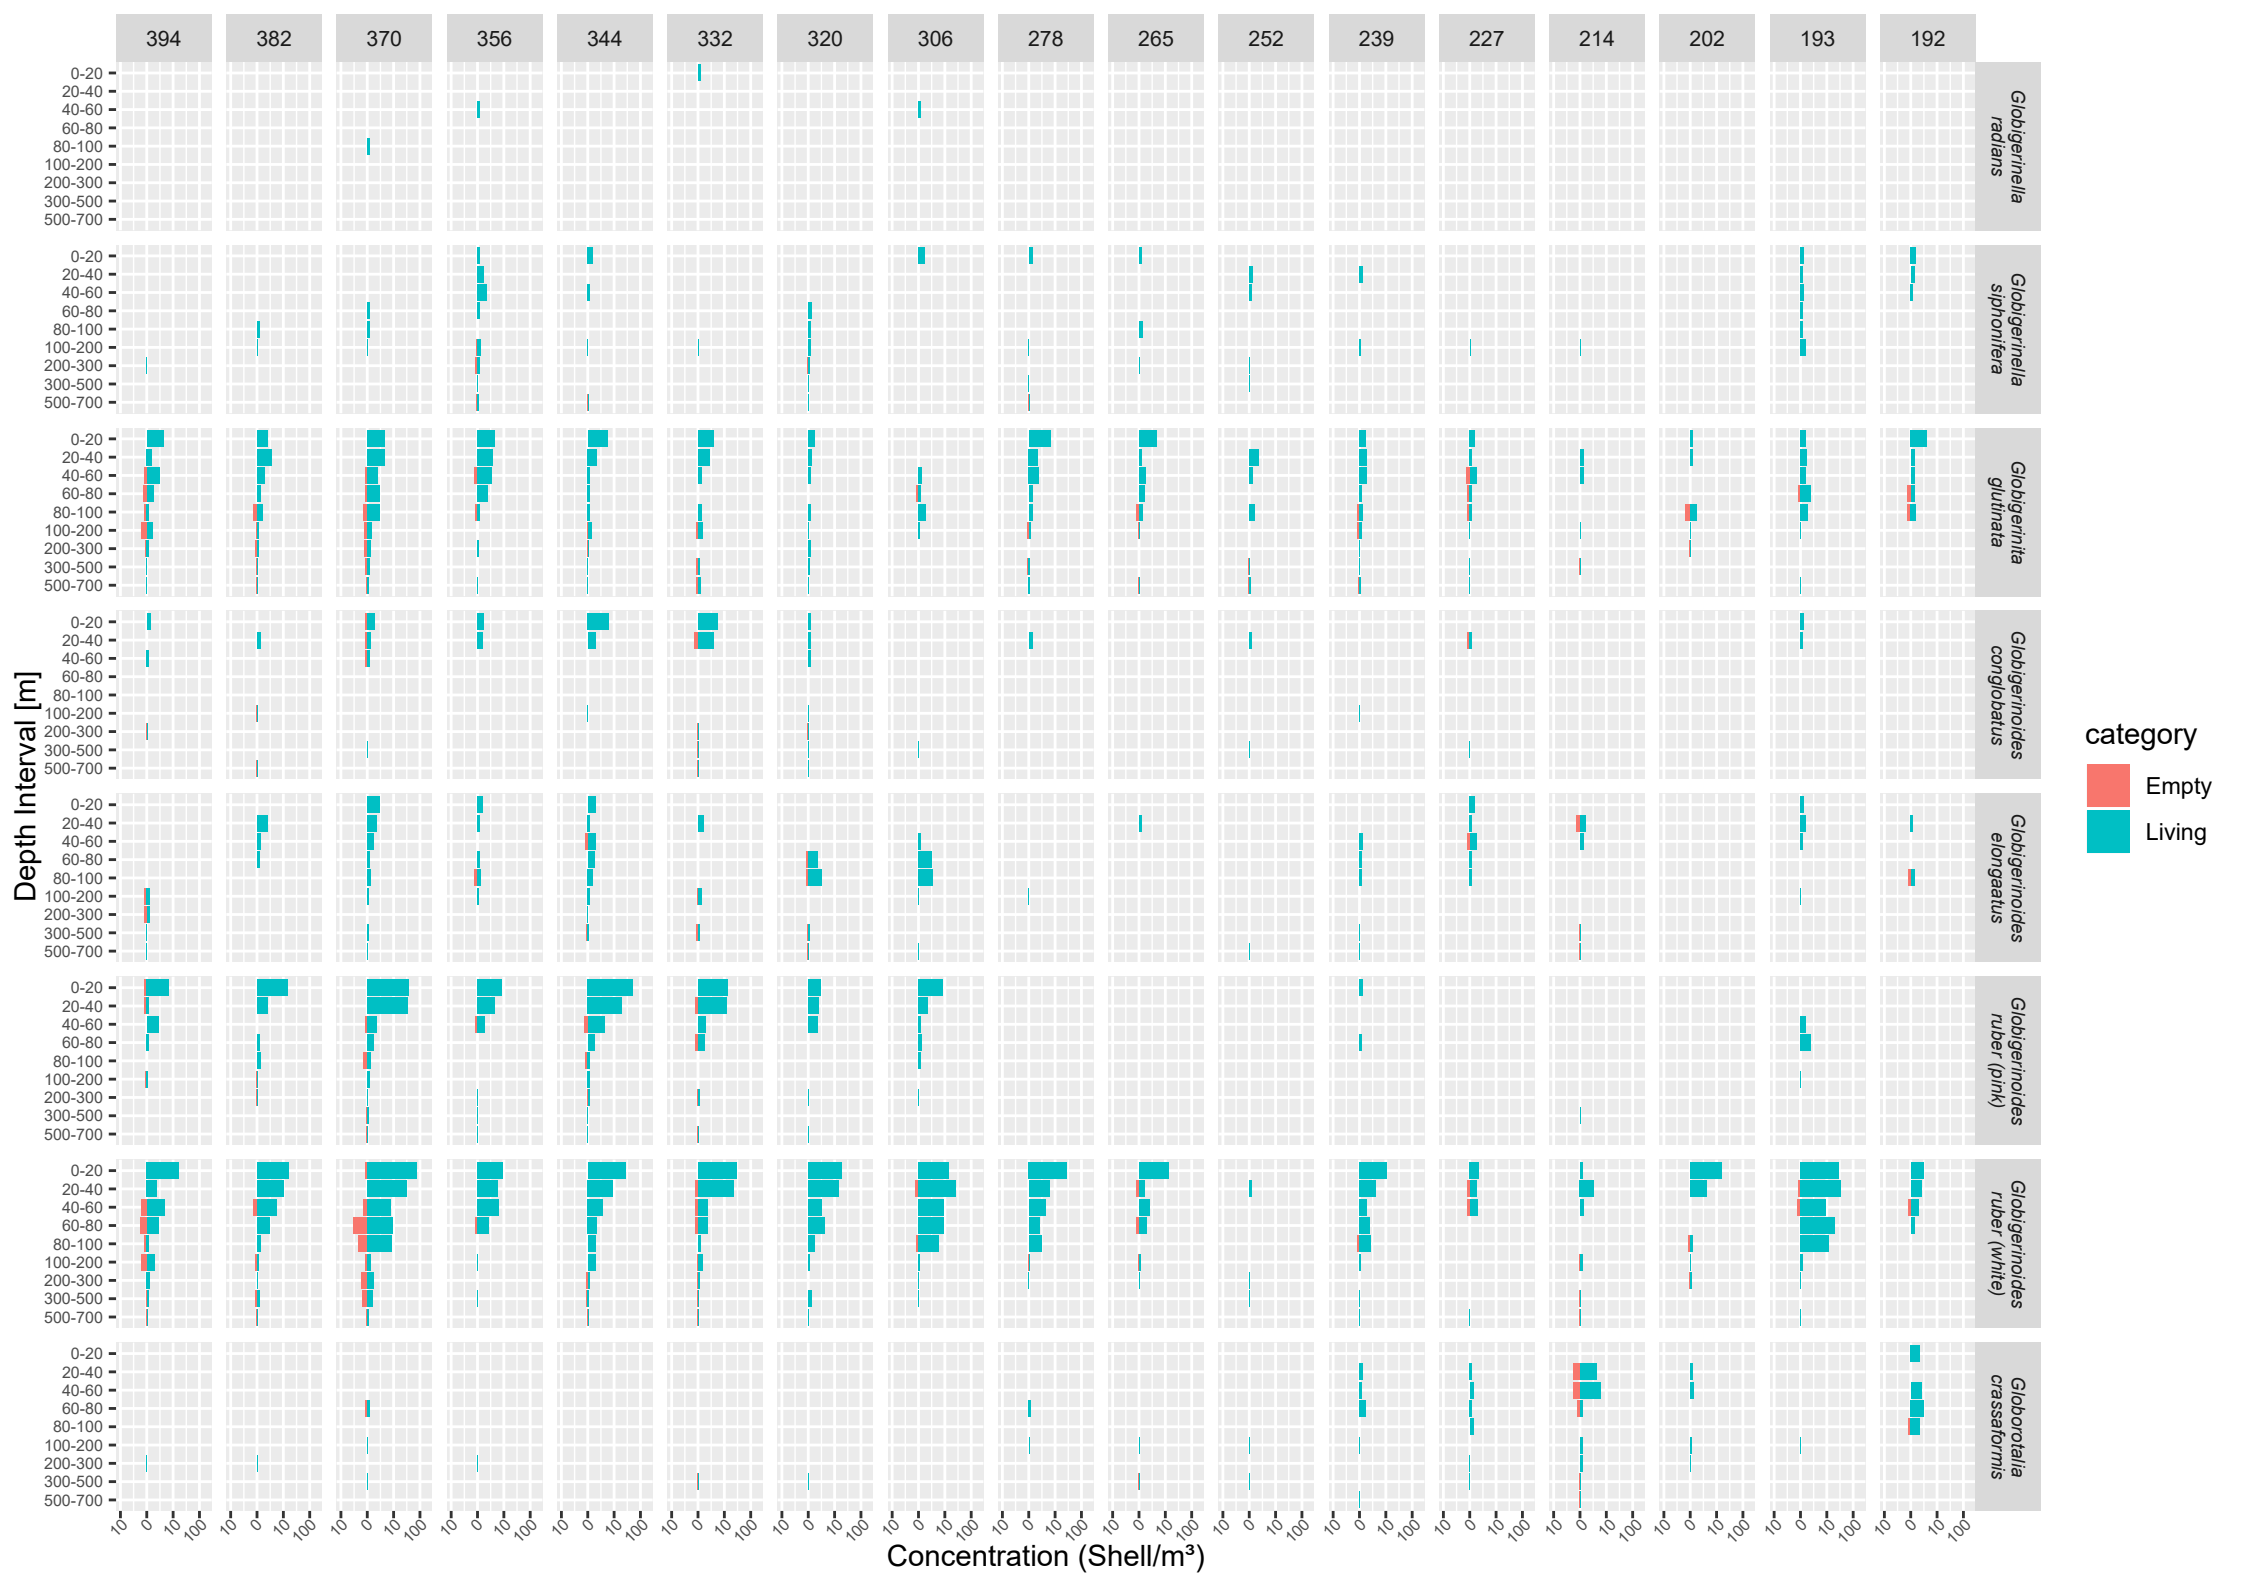

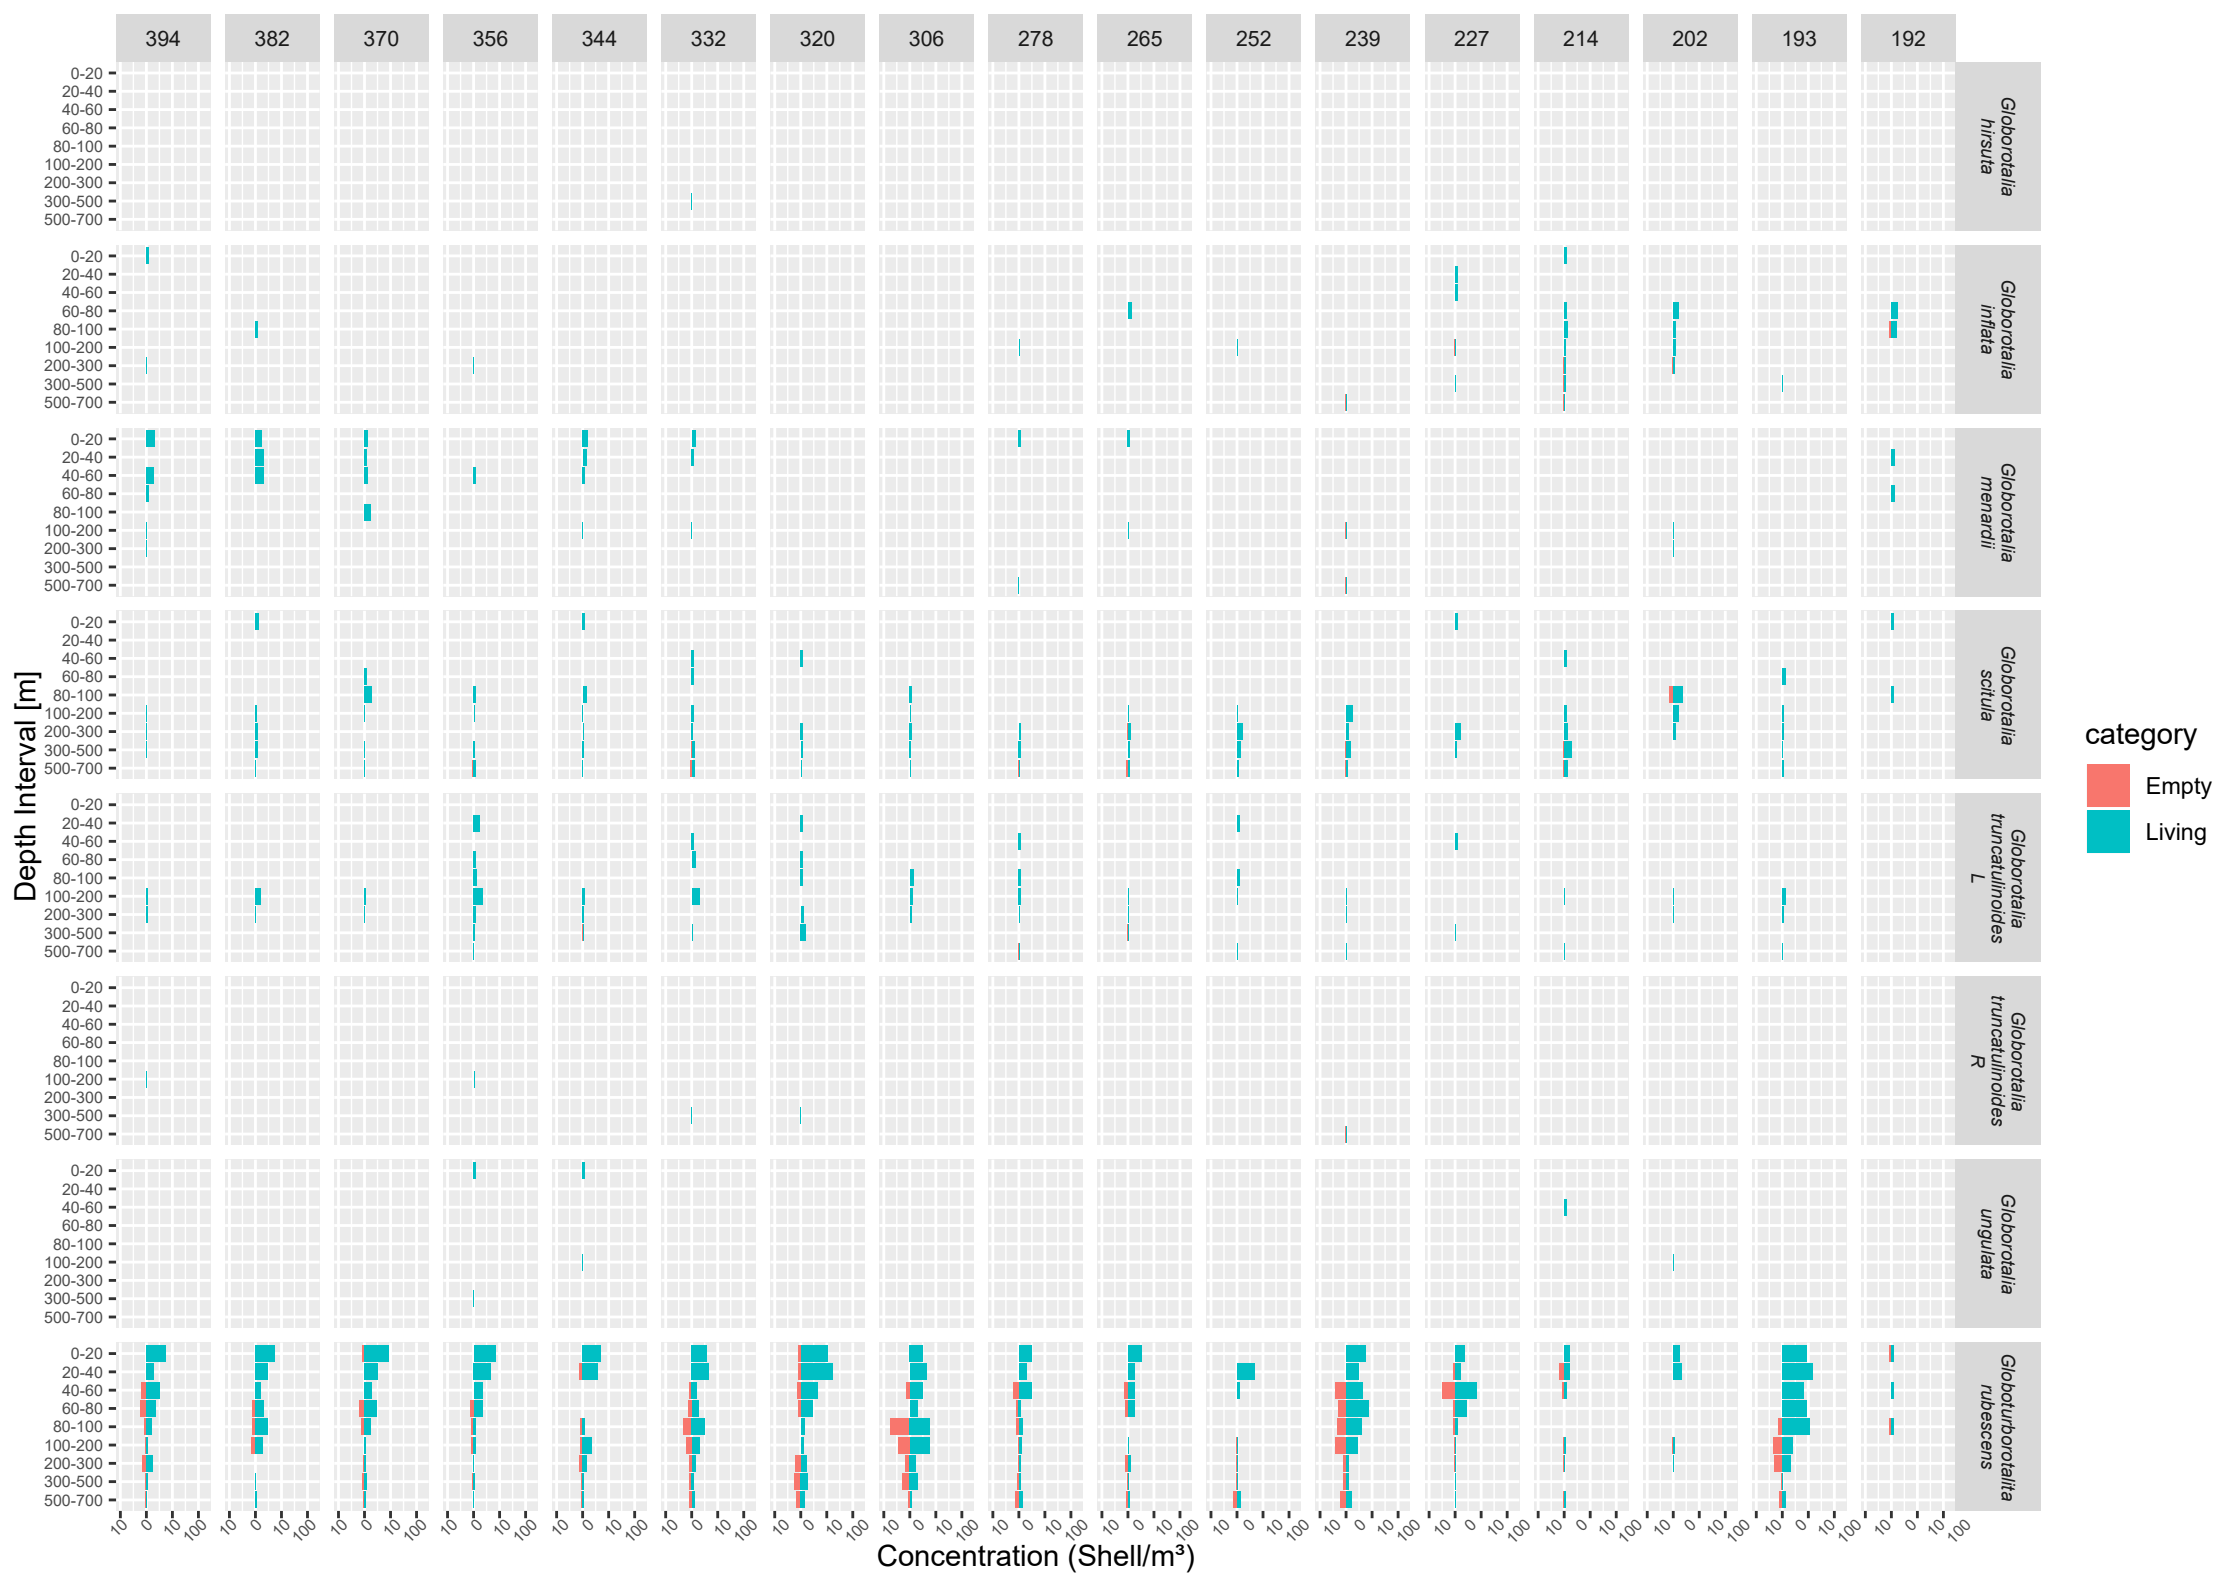

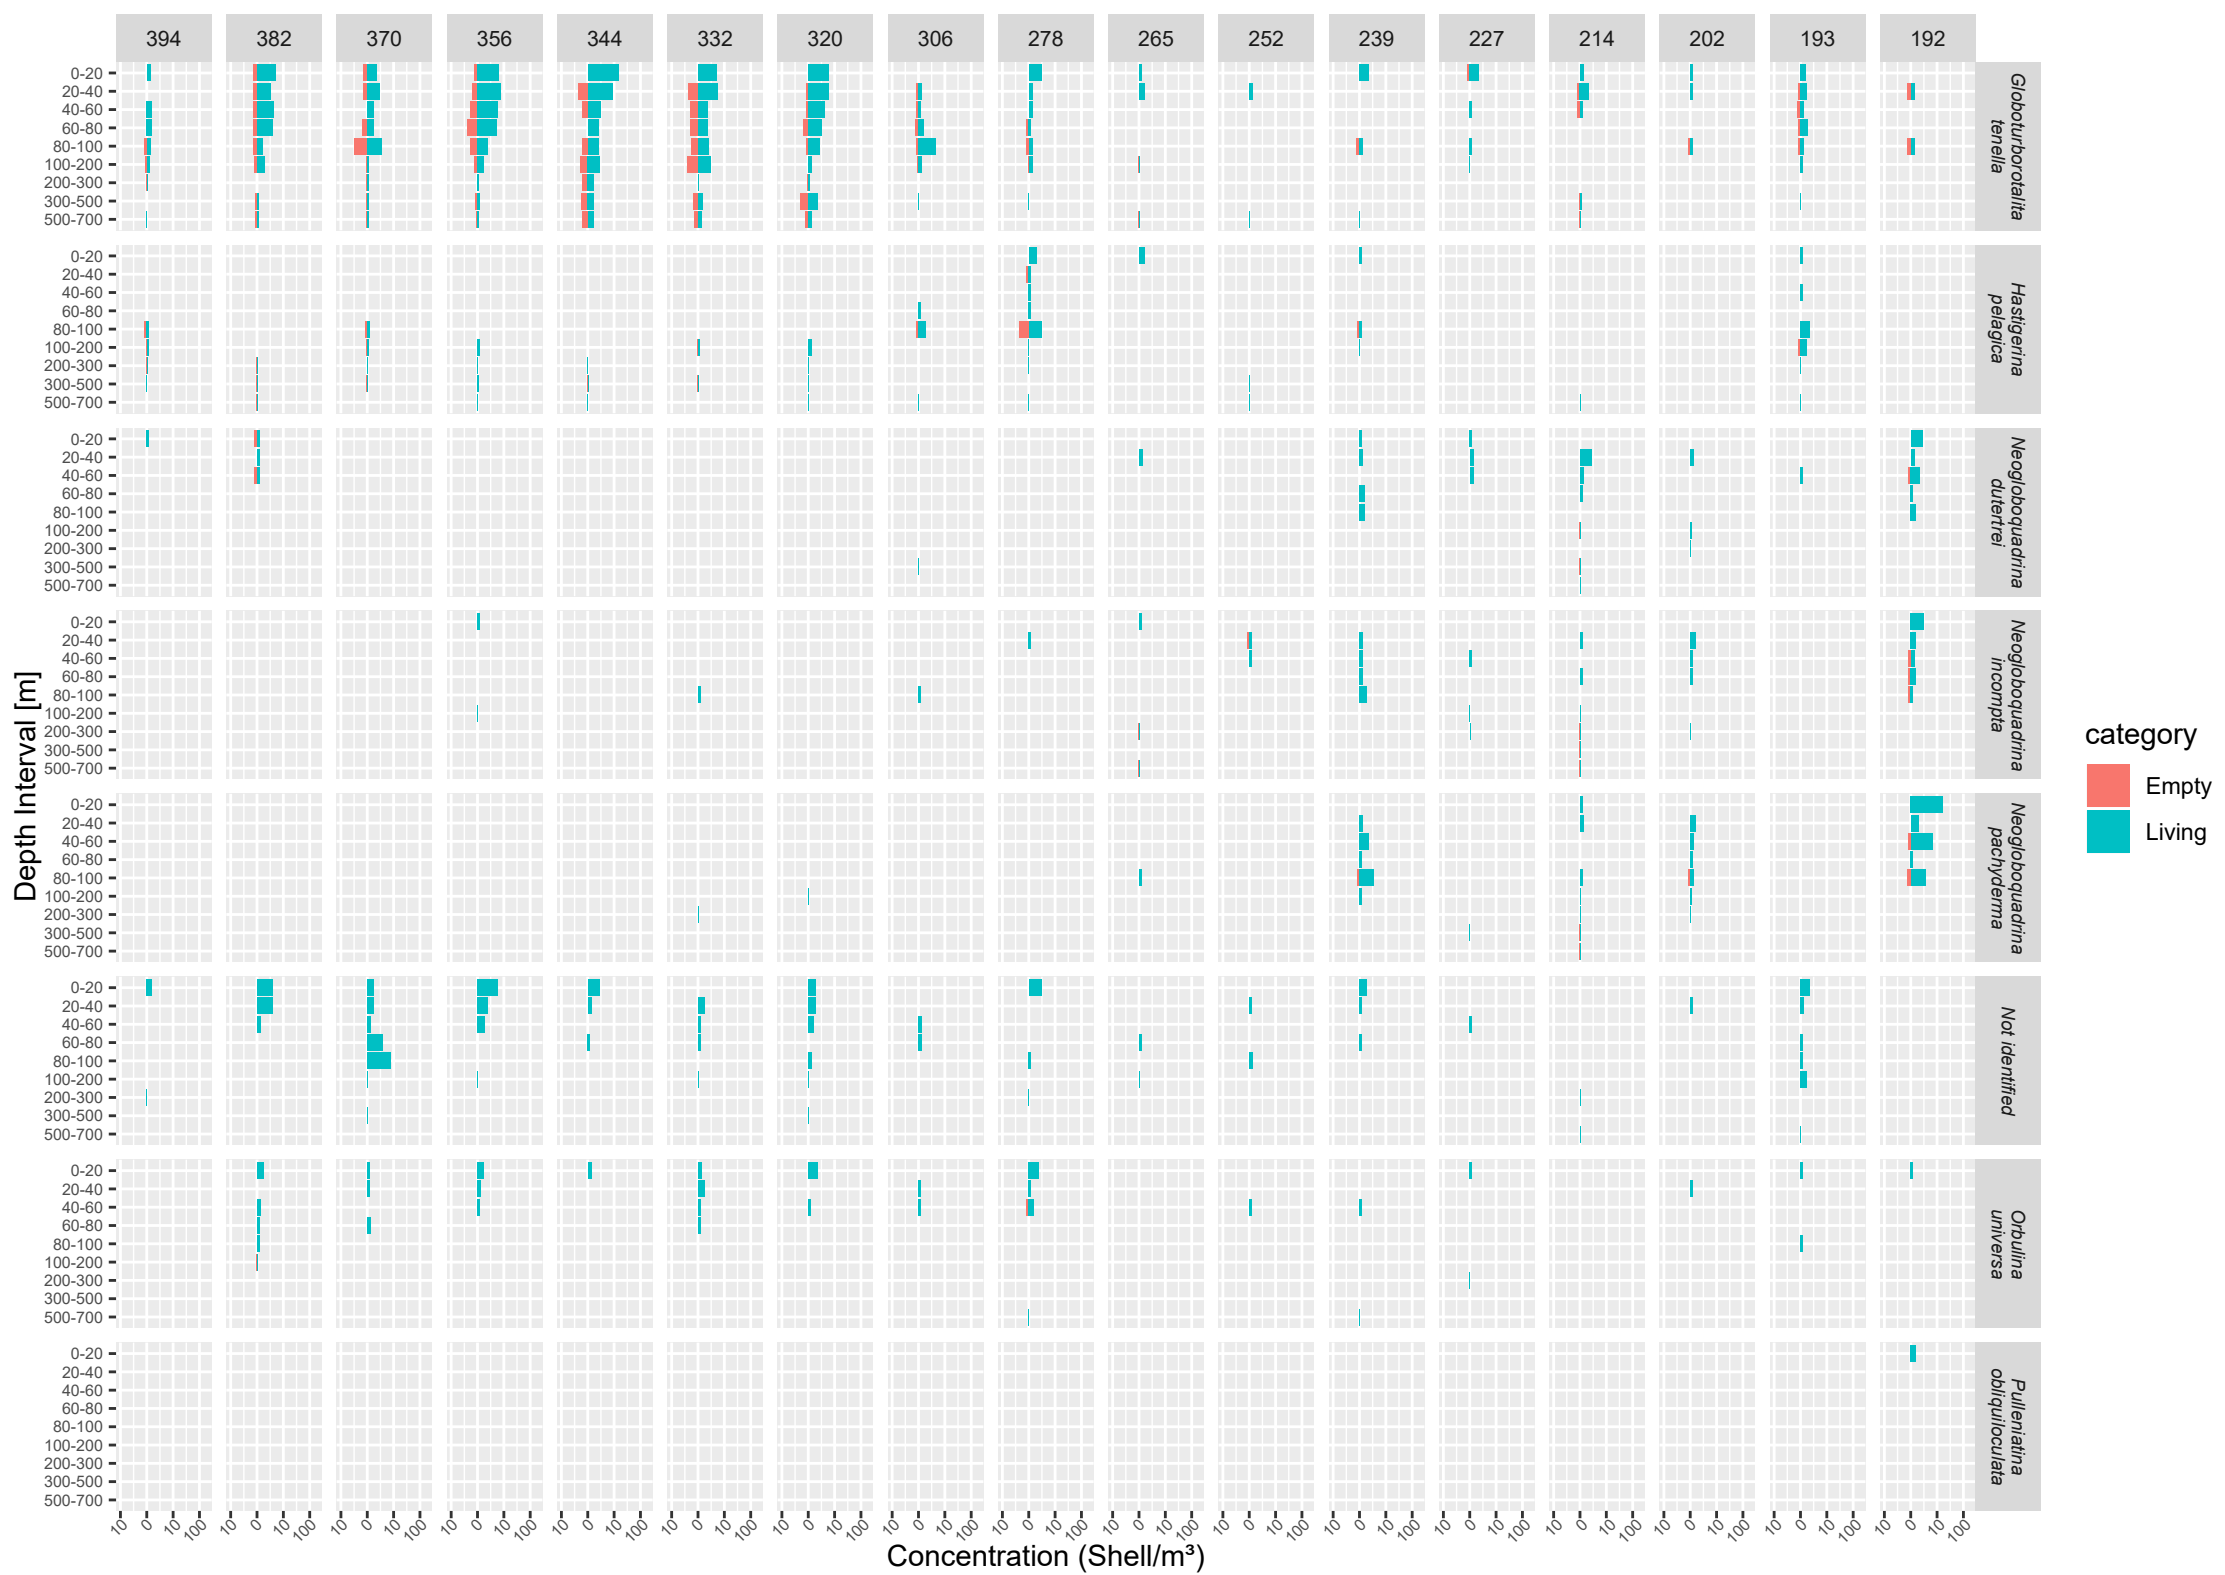

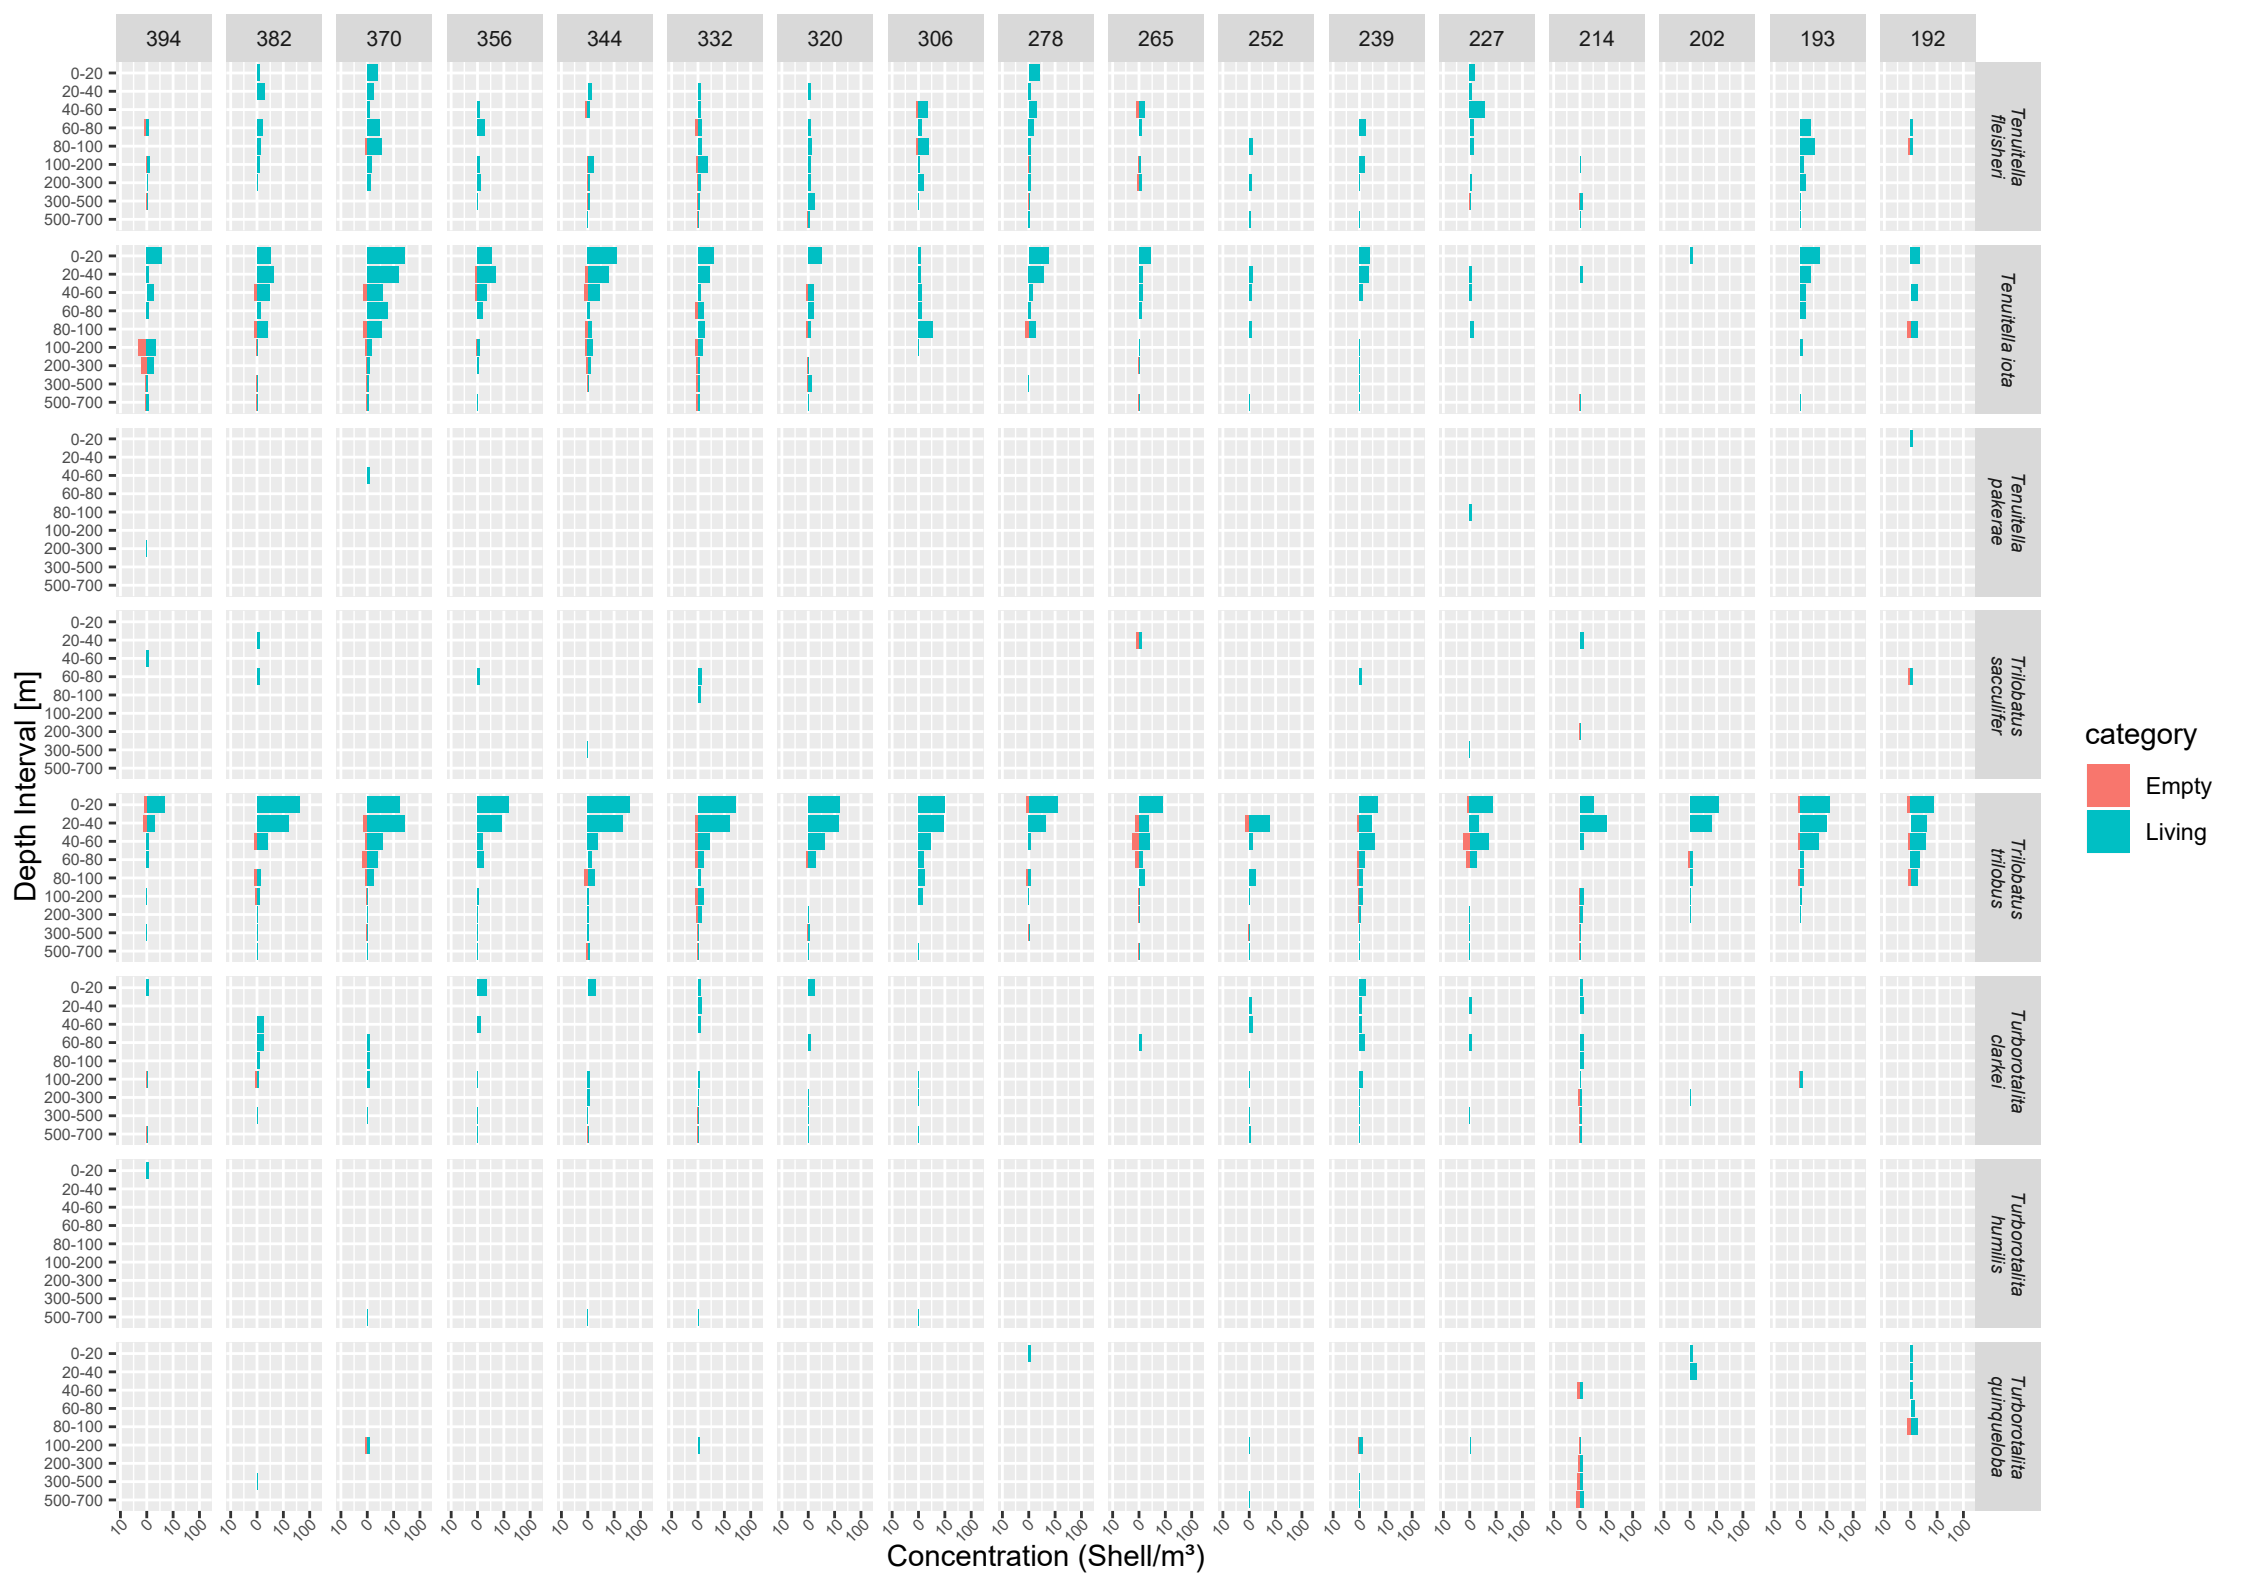

Supplement: Supplementary file 1 [file bg-17-4313-2020-supplement.zip › Figure S2.pdf]

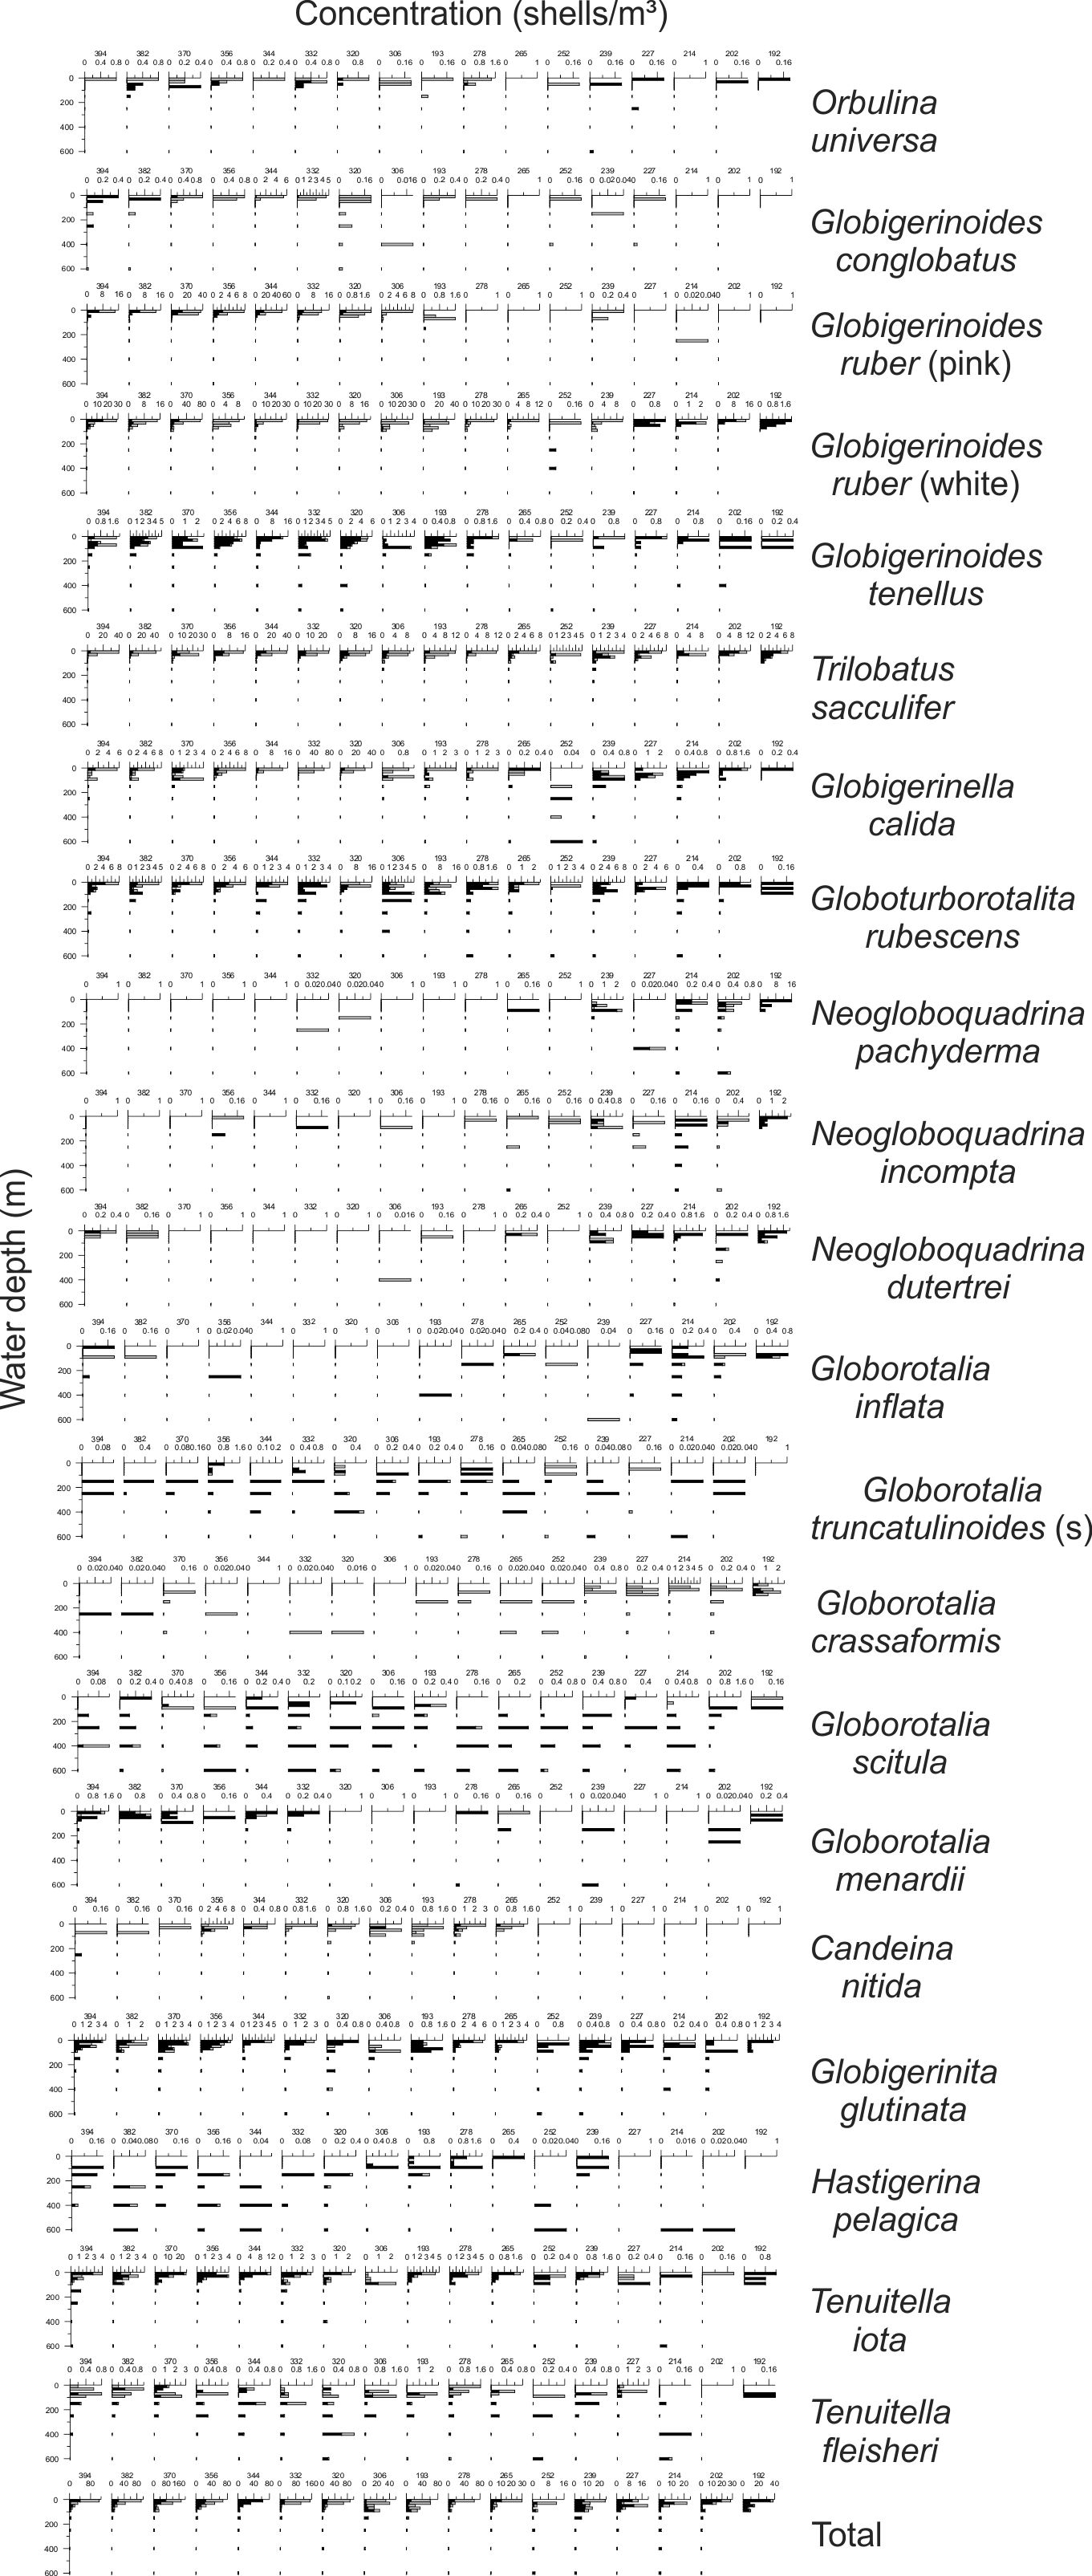

Supplement: Supplementary file 1 [file bg-17-4313-2020-supplement.zip › Figure S3.jpg]
